# Supplementary material for: A novel ditopic zinc-salophen macrocycle: a potential two-stationed wheel for [2]-pseudorotaxanes
Source: Royal Society of Chemistry journal article supplement (doi:10.1039/b613705a), 2006-01-01
Supplement: b613705a.pdf [file b613705a.pdf]

## Electronic Supplementary Information

(for the communication "A Novel Ditopic Zinc-Salophen Macrocycle as Potential Wheel for [2] Pseudorotaxanes with pH driven intra wheel

Motion of the Axle"

submitted by Antonella Dalla Cort,\* Luigi Mandolini, Chiara Pasquini, Luca Schiaffino)

## A Novel Ditopic Zinc-Salophen Macrocycle as Potential Wheel for [2]-Pseudorotaxanes with pH driven intra wheel Motion of the Axle

Antonella Dalla Cort,\* Luigi Mandolini, Chiara Pasquini, Luca Schiaffino

Dipartimento di Chimica and IMC-CNR Sezione Meccanismi di Reazione, Università La Sapienza, Box 34 Roma 62,

00185 Roma, Italy

### UV-vis titration of 1 with dibenzylamine

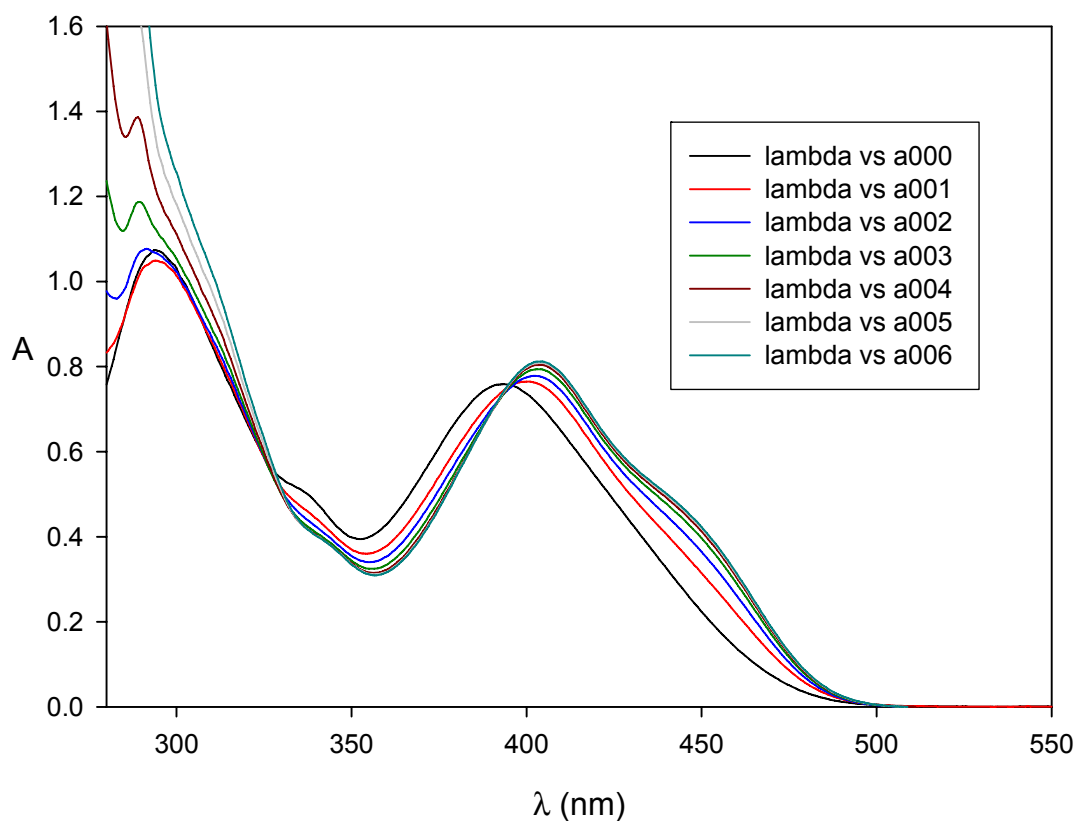

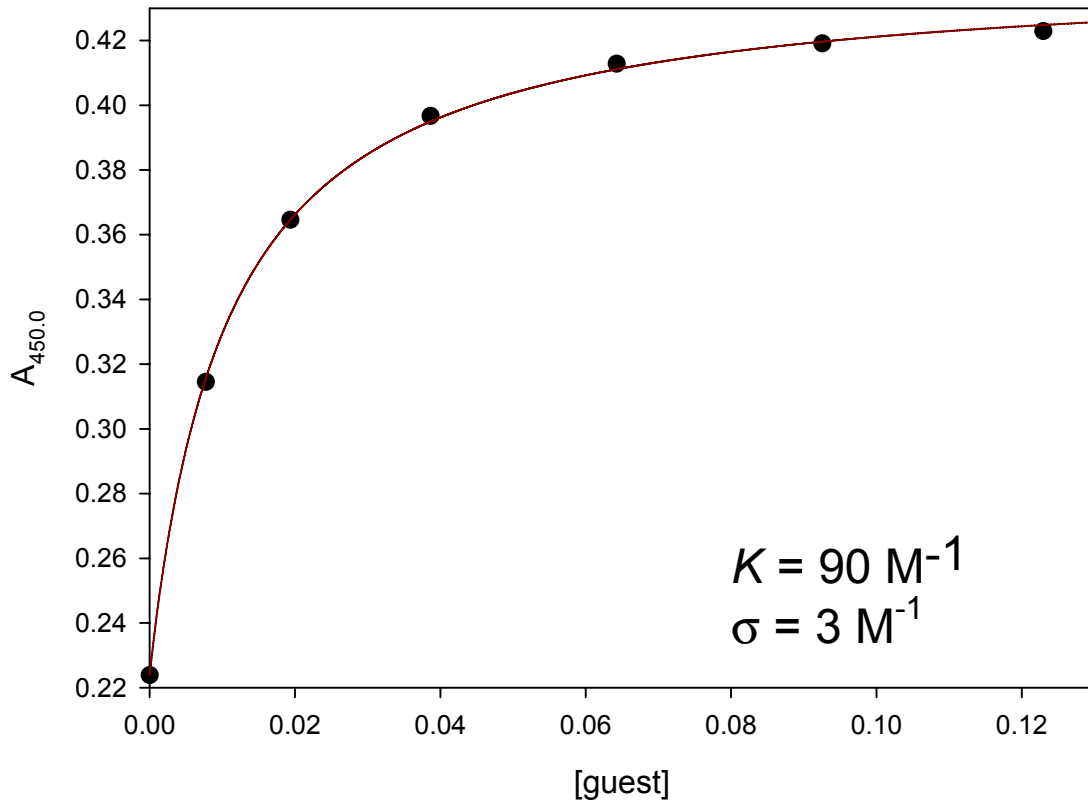

### UV-vis titration of 1 with dipropylamine

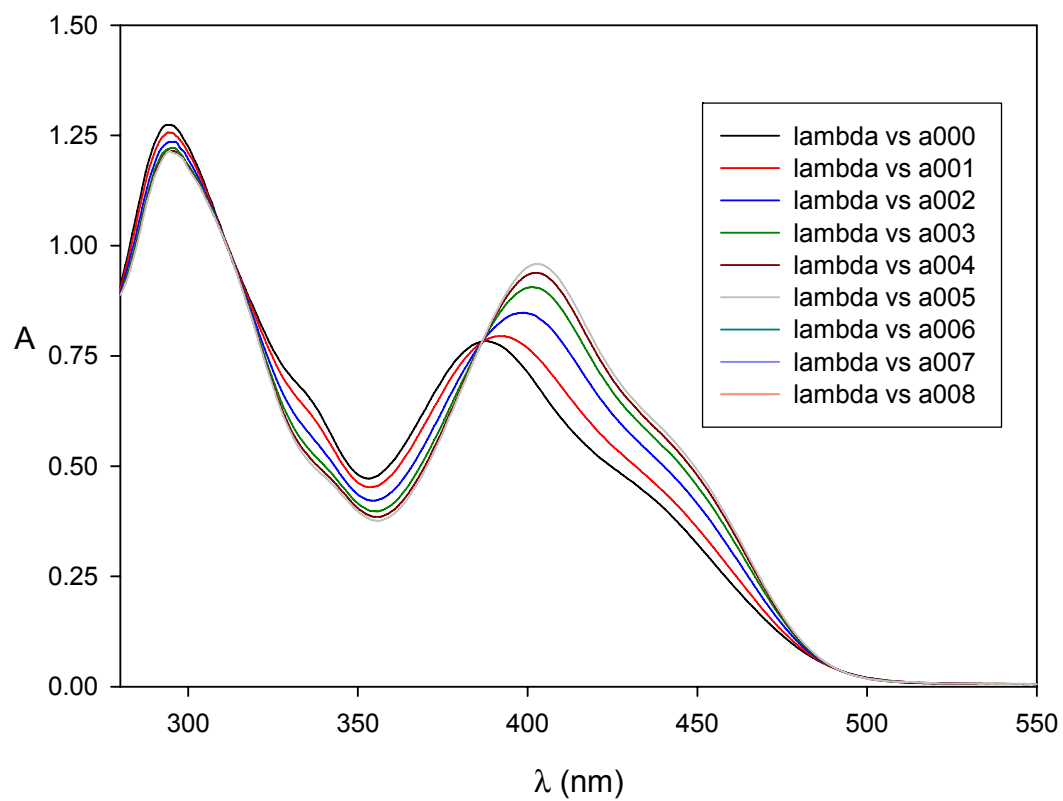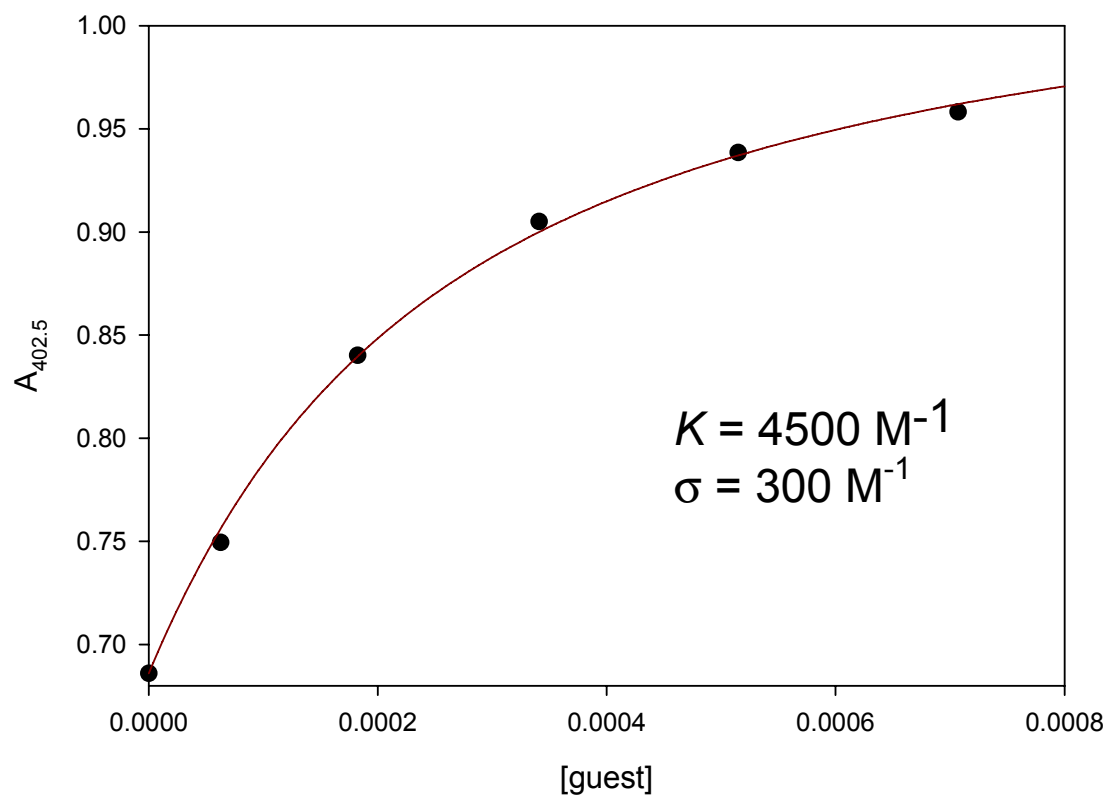

### UV-vis titration of 1 with dipropylammonium methanesulfonate

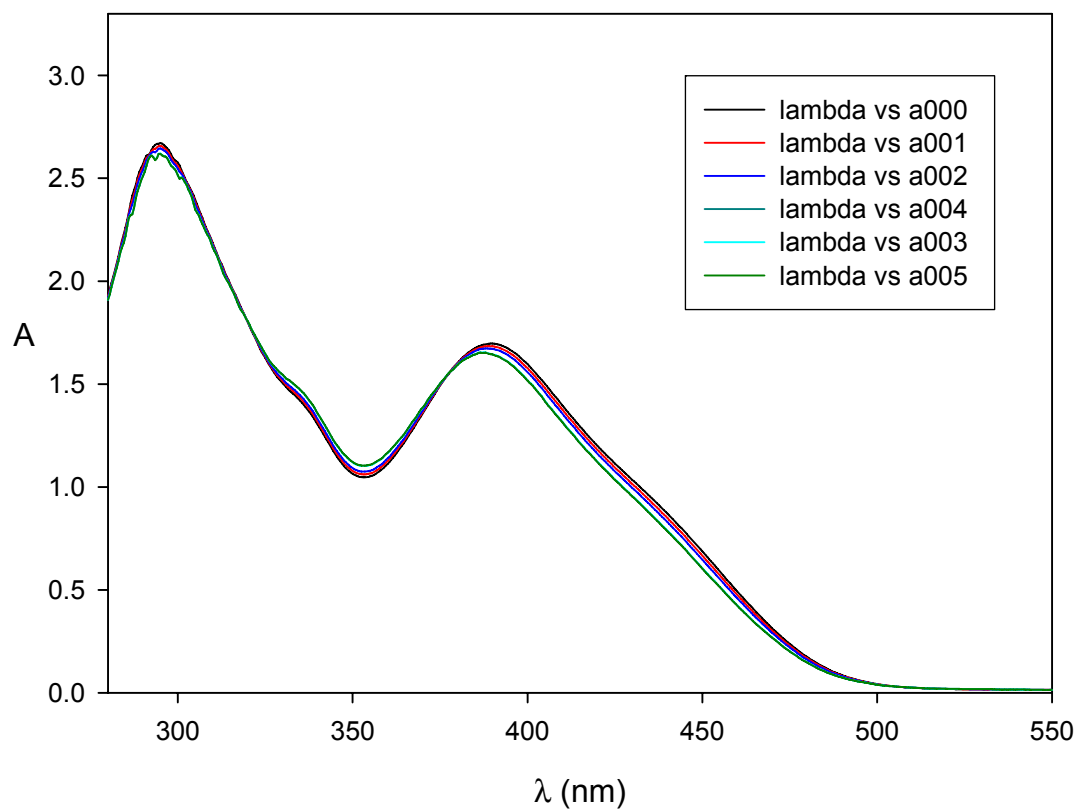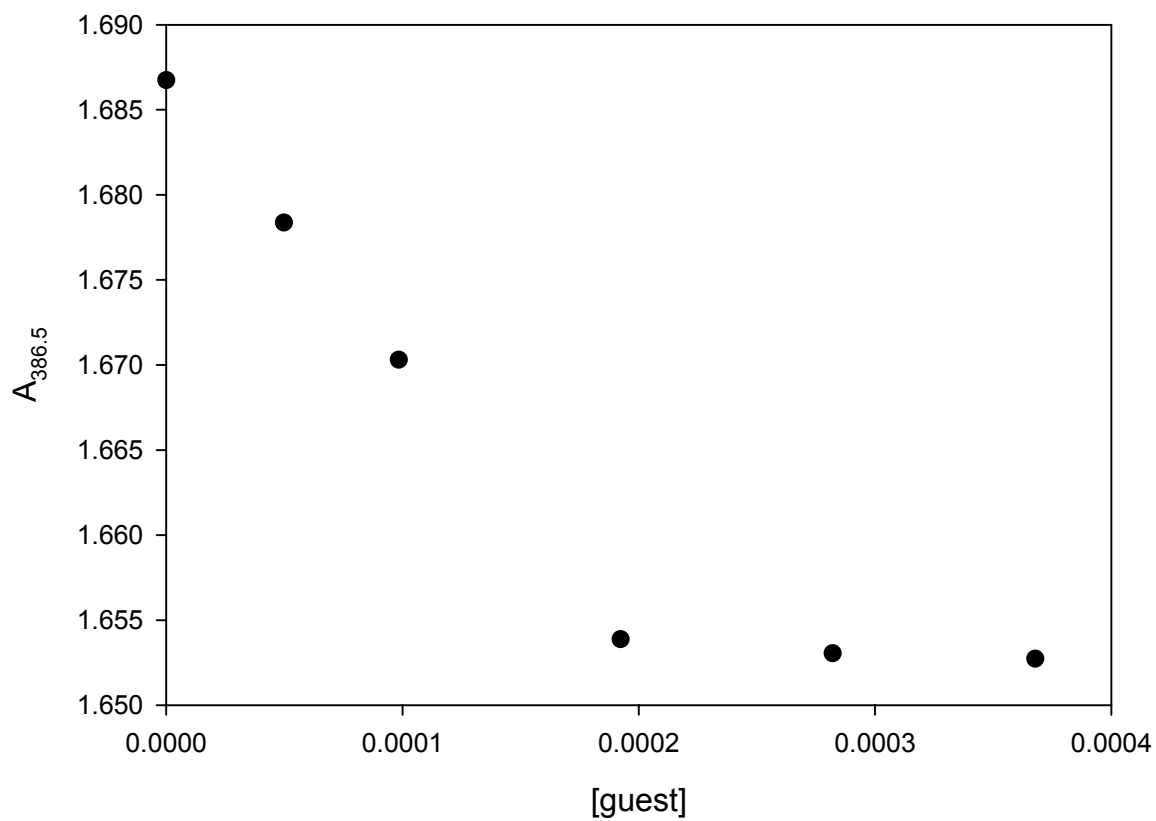

### Calculation details

Molecular mechanics calculation were carried out utilising the force field MM3 as implemented in Macromodel Version 6.0. The parameters introduced for zinc, imine nitrogens, phenoxide oxygens, and imine hydrogens are given below. Partial atomic charges were computed using the electrostatic potential (ESP) from the wavefunction obtained by an AM1 calculation in SPARTAN Version 5.0.1, whilst charge +2 on the zinc was used for the zinc cation.

#### Lines added in the file atom.typ

| at_tpy | at_no | at_wt    | name | color | vdw_rad | deloc | cat | 1-3 | el_neg | wild | UA   | no_H | pdb_name | 1-3 | fchg |
|--------|-------|----------|------|-------|---------|-------|-----|-----|--------|------|------|------|----------|-----|------|
|        |       |          |      |       |         |       |     | del | eqv    |      | root |      |          |     | slv  |
| 204    | 30    | 65.37000 | Z1   | 15    | 0.74    | F     | F   | !   | 1.20   | F    | !    | !    | !        | !   | +2   |
| 205    | 8     | 15.99940 | OZ   | 16    | 1.52    | T     | T   | OM  | 3.50   | F    | !    | !    | !        | !   | 0    |
| 206    | 7     | 14.00670 | NZ   | 4     | 1.55    | T     | T   | !   | 3.00   | F    | N2   | 0    | !        | !   | 0    |
| 207    | 1     | 1.00797  | HI   | 5     | 1.20    | F     | F   | !   | 2.00   | F    | !    | !    | !        | !   | 0    |

#### Lines added in the file mm3.fld

##### Stretching Interactions

|         |        |         |         |      |      |     |
|---------|--------|---------|---------|------|------|-----|
| OZ - C2 | 1.3550 | 6.0000  | -0.0010 | 0000 | 0000 | O 3 |
| NZ - C2 | 1.3300 | 6.3000  | -1.0000 | 0000 | 0000 | A 2 |
| NZ = C2 | 1.3450 | 10.0000 | -1.3000 | 0000 | 0000 | O 3 |
| C2 - HI | 1.1010 | 5.1500  | -0.6000 | 0000 | 0000 | O 1 |

##### Bending Interactions

|              |          |        |        |      |      |      |     |
|--------------|----------|--------|--------|------|------|------|-----|
| HI - C2 = NZ | 120.0000 | 0.0200 | 0.3000 | 0000 | 0000 | 0000 | O 2 |
| C2 - C2 - HI | 117.0000 | 0.0200 | 0.3000 | 0000 | 0000 | 0000 | O 1 |

##### Torsional Interactions

|                   |        |         |        |      |      |      |      |     |
|-------------------|--------|---------|--------|------|------|------|------|-----|
| C2 * C2 * C2 = NZ | 0.0000 | 15.0000 | 0.0000 | 0000 | 0000 | 0000 | 0000 | A 2 |
|-------------------|--------|---------|--------|------|------|------|------|-----|

##### Benzenoid

|      |        |        |
|------|--------|--------|
| 1 OZ | 1.2700 | 8.7800 |
|------|--------|--------|

|            |          |         |         |                     |
|------------|----------|---------|---------|---------------------|
| 1 NZ       | 1.3780   | 6.3200  | -0.6300 |                     |
| 1 2 OZ     | 120.0000 | 5.0000  |         | 0000 0000 0000      |
| 1 2 C2     | 126.0000 | 19.6000 |         | OZ00 0000 0000      |
| 1 2 C3     | 123.0000 | 0.9000  |         | OZ00 0000 0000      |
| 1 2 NZ     | 125.0000 | 10.0000 |         | H100 0000 0000      |
| 1 NZ C2    | 117.0000 | 3.0000  |         |                     |
| 1 C2 NZ    | 123.0000 | 3.0000  |         |                     |
| 1 C2 HI    | 120.0000 | 0.4900  |         | 0000 0000 0000      |
| 1 2 NZ 00  | 0.0000   | 3.5000  | 0.0000  |                     |
| 1 2 NZ C2  | 0.0000   | 3.6000  | 2.6000  | H100 0000 0000 0000 |
| 1 2 C2 NZ  | 0.0000   | 20.0000 | 0.0000  |                     |
| 1 NZ C2 00 | 0.0000   | 65.0000 | 0.0000  |                     |
| 1 2 C2 HI  | 0.0000   | 1.6000  | 0.0000  |                     |

Van der Waals Interactions

|    |        |        |         |        |      |     |
|----|--------|--------|---------|--------|------|-----|
| Z1 | 2.0500 | 0.0500 | 0.0000  | 2.0000 | 0000 | A 2 |
| OZ | 1.8300 | 0.0800 | 0.0000  |        | 0000 | A 2 |
| NZ | 1.2600 | 0.0800 | 0.0000  |        | 0000 | O 2 |
| HI | 1.5200 | 0.0200 | -0.0770 |        | 0000 | O 1 |

Special Van der Waals Interactions

|       |        |        |      |      |     |
|-------|--------|--------|------|------|-----|
| N3 OZ | 5.0000 | 0.1230 | 0000 | 0000 | O 1 |
| N3 NZ | 5.0000 | 0.1230 | 0000 | 0000 | O 1 |
| N3 Z1 | 2.7000 | 0.1500 | 0000 | 0000 | O 1 |
| O3 NZ | 4.8900 | 0.1230 | 0000 | 0000 | O 1 |
| O3 Z1 | 2.5900 | 0.1500 | 0000 | 0000 | O 1 |
| HI H1 | 1.8000 | 0.0230 | 0000 | 0000 | O 1 |

### Structure of the 1-dibenzylammonium complex in Cartesian coordinates

|   |           |          |          |
|---|-----------|----------|----------|
| O | -11.71837 | 6.23600  | -6.70005 |
| C | -5.35625  | 3.99300  | -5.97017 |
| C | -6.19314  | 3.33127  | -6.85859 |
| C | -7.43507  | 3.86369  | -7.14543 |
| C | -7.82304  | 5.03933  | -6.55775 |
| C | -7.01100  | 5.70375  | -5.68055 |
| C | -5.76148  | 5.18029  | -5.37831 |
| O | -8.97335  | 5.53370  | -6.81789 |
| C | -7.33502  | 6.95377  | -5.00278 |
| N | -8.53034  | 7.55509  | -5.21395 |
| C | -8.79098  | 8.73683  | -4.51625 |
| C | -7.83188  | 9.54248  | -3.91498 |
| C | -8.22582  | 10.70531 | -3.25353 |
| C | -9.57425  | 11.05914 | -3.20112 |
| C | -10.53345 | 10.25077 | -3.81031 |
| C | -10.13857 | 9.09064  | -4.46373 |
| N | -10.99421 | 8.20247  | -5.11957 |
| C | -12.31604 | 8.28214  | -4.83551 |
| C | -13.26291 | 7.37165  | -5.47297 |
| C | -14.59053 | 7.55380  | -5.10370 |
| C | -15.57462 | 6.74283  | -5.65474 |
| C | -15.23696 | 5.75666  | -6.57416 |
| C | -13.90987 | 5.58453  | -6.92734 |
| C | -12.94492 | 6.39407  | -6.37746 |
| H | -5.87849  | 2.38970  | -7.33697 |
| H | -5.08649  | 5.69926  | -4.67413 |
| H | -6.60349  | 7.38696  | -4.30373 |
| H | -6.76214  | 9.27747  | -3.95301 |
| H | -7.47200  | 11.35304 | -2.77120 |
| H | -9.87733  | 11.98382 | -2.67798 |
| H | -11.59497 | 10.54512 | -3.76579 |
| H | -12.69477 | 9.02084  | -4.11194 |
| H | -14.87712 | 8.33675  | -4.37818 |
| H | -16.01592 | 5.11364  | -7.01946 |
| O | -4.20824  | 2.24922  | -4.88118 |
| C | -17.00970 | 6.95988  | -5.25064 |
| C | -3.99876  | 3.42515  | -5.65763 |
| H | -13.62963 | 4.80701  | -7.65265 |
| H | -8.10541  | 3.34820  | -7.84724 |
| H | -17.70904 | 6.25608  | -5.74787 |
| H | -17.32240 | 7.98275  | -5.55246 |
| H | -3.43620  | 3.21324  | -6.59107 |
| H | -3.38445  | 4.13908  | -5.06926 |
| C | -17.34270 | 5.53946  | -3.33695 |
| H | -17.61999 | 5.61985  | -2.26292 |
| H | -18.21083 | 5.07605  | -3.85281 |
| C | -3.80846  | 1.07289  | -5.57804 |
| C | -4.05691  | -0.14961 | -4.69217 |
| H | -2.72295  | 1.14075  | -5.81259 |

|    |           |          |          |
|----|-----------|----------|----------|
| H  | -4.35696  | 0.96489  | -6.53796 |
| H  | -3.41772  | -0.98593 | -5.05095 |
| H  | -3.73388  | 0.06220  | -3.65056 |
| C  | -16.08988 | 4.67942  | -3.46852 |
| H  | -15.90634 | 4.45241  | -4.53813 |
| H  | -15.22048 | 5.25161  | -3.08225 |
| C  | -15.09879 | 2.64003  | -2.70112 |
| C  | -14.19907 | 3.05935  | -1.53943 |
| H  | -15.42555 | 1.58842  | -2.54911 |
| H  | -14.55877 | 2.66993  | -3.67025 |
| H  | -14.76866 | 2.95374  | -0.58978 |
| H  | -13.89943 | 4.12451  | -1.63148 |
| C  | -6.34506  | 0.31417  | -4.15027 |
| C  | -7.66451  | -0.43344 | -3.94379 |
| H  | -5.94850  | 0.69987  | -3.18862 |
| H  | -6.50202  | 1.18336  | -4.82349 |
| H  | -8.13616  | -0.61768 | -4.93353 |
| H  | -7.48029  | -1.43538 | -3.49783 |
| C  | -12.25432 | 2.50066  | -0.34059 |
| H  | -11.69917 | 3.45719  | -0.45539 |
| H  | -12.91757 | 2.60506  | 0.54651  |
| C  | -8.13186  | 0.44233  | -1.77534 |
| C  | -9.31578  | 0.30977  | -0.82049 |
| H  | -7.64597  | 1.43501  | -1.65306 |
| H  | -7.37813  | -0.33425 | -1.51868 |
| H  | -8.94769  | 0.37633  | 0.22690  |
| H  | -9.79800  | -0.68494 | -0.94413 |
| C  | -11.28698 | 1.34698  | -0.08560 |
| H  | -11.83386 | 0.37861  | -0.09574 |
| H  | -10.83485 | 1.46678  | 0.92360  |
| O  | -17.10181 | 6.85527  | -3.83242 |
| O  | -16.26214 | 3.46284  | -2.74239 |
| O  | -13.03406 | 2.23232  | -1.50979 |
| O  | -10.25811 | 1.35121  | -1.07208 |
| O  | -8.58850  | 0.28627  | -3.12515 |
| O  | -5.41287  | -0.59893 | -4.72610 |
| Zn | -10.05057 | 6.91735  | -6.23102 |
| H  | -10.15597 | -2.04025 | -4.08128 |
| C  | -11.03004 | -2.05671 | -3.40940 |
| C  | -13.23145 | -2.13630 | -1.69947 |
| C  | -11.95584 | -1.00997 | -3.41926 |
| C  | -11.20520 | -3.13807 | -2.54602 |
| C  | -12.30514 | -3.17782 | -1.69077 |
| C  | -13.05842 | -1.05413 | -2.56201 |
| C  | -11.76661 | 0.16076  | -4.35349 |
| H  | -10.47387 | -3.96477 | -2.53979 |
| H  | -12.44403 | -4.03501 | -1.00948 |
| H  | -13.80084 | -0.23972 | -2.55966 |
| H  | -14.10393 | -2.17129 | -1.02430 |
| H  | -12.75391 | 0.42225  | -4.80147 |
| H  | -11.12171 | -0.15412 | -5.20729 |



|   |           |         |          |
|---|-----------|---------|----------|
| N | -11.16515 | 1.33744 | -3.64445 |
| H | -10.26911 | 1.05834 | -3.21953 |
| C | -10.93779 | 2.48854 | -4.58747 |
| H | -11.86711 | 2.72024 | -5.15850 |
| H | -10.16711 | 2.22637 | -5.35175 |
| C | -10.49812 | 3.71965 | -3.83188 |
| C | -9.67211  | 5.96901 | -2.39388 |
| C | -9.15173  | 3.88342 | -3.49776 |
| C | -11.42928 | 4.68900 | -3.44984 |
| C | -11.01622 | 5.81145 | -2.73100 |
| C | -8.74053  | 5.00579 | -2.77925 |
| H | -8.40282  | 3.12590 | -3.79140 |
| H | -12.49663 | 4.56977 | -3.70481 |
| H | -11.75543 | 6.57136 | -2.42029 |
| H | -7.67499  | 5.12448 | -2.51189 |
| H | -9.34441  | 6.85325 | -1.81847 |
| H | -11.78033 | 1.62893 | -2.87086 |

**Structure of the 1-dipropylamine inner complex in Cartesian coordinates**

|   |           |          |           |
|---|-----------|----------|-----------|
| O | -12.33583 | 7.43580  | -8.42673  |
| C | -5.82990  | 5.05616  | -8.76632  |
| C | -6.80924  | 4.38853  | -9.48788  |
| C | -8.11632  | 4.83355  | -9.42891  |
| C | -8.43192  | 5.93194  | -8.66562  |
| C | -7.47407  | 6.59994  | -7.95105  |
| C | -6.15692  | 6.16817  | -8.00339  |
| O | -9.64266  | 6.32099  | -8.58557  |
| C | -7.70067  | 7.77116  | -7.10600  |
| N | -8.94412  | 8.25258  | -6.89120  |
| C | -9.06479  | 9.39658  | -6.10165  |
| C | -8.01766  | 10.01815 | -5.42371  |
| C | -8.26650  | 11.15203 | -4.65097  |
| C | -9.55943  | 11.66310 | -4.55274  |
| C | -10.61029 | 11.04204 | -5.22627  |
| C | -10.36595 | 9.91028  | -6.00115  |
| N | -11.33198 | 9.19628  | -6.70387  |
| C | -12.60725 | 9.63266  | -6.64047  |
| C | -13.67470 | 8.95079  | -7.37215  |
| C | -14.95037 | 9.45123  | -7.14072  |
| C | -16.04250 | 8.87566  | -7.77787  |
| C | -15.86074 | 7.81289  | -8.65521  |
| C | -14.58384 | 7.32628  | -8.87732  |
| C | -13.50722 | 7.90227  | -8.24060  |
| H | -6.55522  | 3.50396  | -10.09578 |
| H | -5.36683  | 6.68873  | -7.43259  |
| H | -6.82508  | 8.27051  | -6.66184  |
| H | -6.99134  | 9.62306  | -5.49183  |
| H | -7.43979  | 11.64898 | -4.11366  |
| H | -9.74809  | 12.56102 | -3.93845  |
| H | -11.62808 | 11.45400 | -5.13858  |
| H | -12.86907 | 10.52190 | -6.04497  |

|   |           |          |          |
|---|-----------|----------|----------|
| H | -15.10990 | 10.29745 | -6.44844 |
| H | -16.72367 | 7.35346  | -9.16732 |
| O | -4.19845  | 4.00167  | -7.49192 |
| C | -17.41818 | 9.42304  | -7.50461 |
| C | -4.40189  | 4.58628  | -8.77429 |
| H | -14.42479 | 6.48232  | -9.56383 |
| H | -8.90412  | 4.30977  | -9.98778 |
| H | -18.21484 | 8.87668  | -8.05106 |
| H | -17.46537 | 10.47943 | -7.84632 |
| H | -4.18039  | 3.86269  | -9.58610 |
| H | -3.70929  | 5.44549  | -8.90105 |
| C | -18.13151 | 8.14342  | -5.58464 |
| H | -18.49989 | 8.31748  | -4.54993 |
| H | -19.00353 | 7.78586  | -6.17303 |
| C | -4.66868  | 2.65624  | -7.42562 |
| C | -4.95375  | 2.29276  | -5.95512 |
| H | -3.88743  | 1.98530  | -7.84480 |
| H | -5.58665  | 2.50773  | -8.03217 |
| H | -4.53200  | 1.28636  | -5.74374 |
| H | -4.43393  | 3.00188  | -5.27616 |
| C | -17.02194 | 7.09550  | -5.54673 |
| H | -16.76817 | 6.79260  | -6.58257 |
| H | -16.11434 | 7.53805  | -5.08443 |
| C | -16.48541 | 4.91213  | -4.73681 |
| C | -15.60077 | 5.07958  | -3.50047 |
| H | -17.01810 | 3.93811  | -4.67365 |
| H | -15.87588 | 4.87461  | -5.66445 |
| H | -16.20415 | 4.89032  | -2.58594 |
| H | -15.20133 | 6.11389  | -3.43345 |
| C | -6.98268  | 3.52997  | -5.64288 |
| C | -8.51011  | 3.34862  | -5.76393 |
| H | -6.70212  | 4.05622  | -4.70743 |
| H | -6.62340  | 4.16113  | -6.47729 |
| H | -8.81149  | 3.55398  | -6.81283 |
| H | -8.80381  | 2.29582  | -5.56415 |
| C | -13.85291 | 3.96700  | -2.33971 |
| H | -13.50424 | 4.93616  | -1.92198 |
| H | -14.56869 | 3.52604  | -1.61112 |
| C | -9.18702  | 3.75305  | -3.53583 |
| C | -10.40824 | 2.88741  | -3.21265 |
| H | -9.15115  | 4.61666  | -2.83874 |
| H | -8.25661  | 3.17519  | -3.34807 |
| H | -10.21300 | 2.32156  | -2.27516 |
| H | -10.59828 | 2.14584  | -4.01804 |
| C | -12.66846 | 3.01232  | -2.52452 |
| H | -12.94703 | 2.18216  | -3.20984 |
| H | -12.40302 | 2.56374  | -1.54190 |
| O | -17.65347 | 9.38682  | -6.09838 |
| O | -17.45916 | 5.95538  | -4.80576 |
| O | -14.51465 | 4.15817  | -3.58831 |
| O | -11.54423 | 3.72853  | -3.03254 |

|    |           |         |          |
|----|-----------|---------|----------|
| O  | -9.22761  | 4.23005 | -4.89070 |
| O  | -6.35729  | 2.24808 | -5.67751 |
| Zn | -10.84567 | 6.90209 | -7.04816 |
| H  | -12.83428 | 2.45309 | -8.65924 |
| C  | -13.10597 | 3.07566 | -7.77595 |
| H  | -14.07027 | 3.57846 | -8.01654 |
| C  | -12.00138 | 4.09027 | -7.43821 |
| H  | -13.29787 | 2.37672 | -6.93063 |
| H  | -11.83050 | 4.72774 | -8.33486 |
| H  | -11.05438 | 3.53580 | -7.24822 |
| C  | -12.35994 | 4.94154 | -6.21780 |
| H  | -13.30324 | 5.49341 | -6.42690 |
| N  | -11.27186 | 5.90961 | -5.83178 |
| H  | -12.58179 | 4.25529 | -5.37386 |
| H  | -11.99692 | 7.61534 | -1.98242 |
| H  | -10.58573 | 5.23523 | -5.37072 |
| C  | -11.83292 | 6.60029 | -4.61997 |
| H  | -12.57532 | 7.36133 | -4.94389 |
| C  | -10.75375 | 7.27697 | -3.77333 |
| H  | -12.38940 | 5.89185 | -3.97484 |
| H  | -10.06889 | 7.87417 | -4.40827 |
| H  | -10.12164 | 6.50133 | -3.28681 |
| C  | -11.34309 | 8.18383 | -2.68177 |
| H  | -11.95441 | 9.00976 | -3.11070 |
| H  | -10.54297 | 8.65891 | -2.06857 |

**Structure of the 1-dipropylamine outer complex in Cartesian coordinates**

|   |           |          |          |
|---|-----------|----------|----------|
| O | -12.27279 | 8.48745  | -9.06719 |
| C | -5.97016  | 5.56983  | -8.79504 |
| C | -6.85545  | 5.15092  | -9.77839 |
| C | -8.09651  | 5.75161  | -9.87443 |
| C | -8.44257  | 6.75160  | -8.99799 |
| C | -7.57495  | 7.17907  | -8.02876 |
| C | -6.32701  | 6.58197  | -7.91620 |
| O | -9.58091  | 7.32165  | -9.10143 |
| C | -7.83752  | 8.23663  | -7.05765 |
| N | -8.98192  | 8.95030  | -7.10681 |
| C | -9.17974  | 9.92871  | -6.13853 |
| C | -8.18593  | 10.46186 | -5.32168 |
| C | -8.50646  | 11.45967 | -4.40149 |
| C | -9.81596  | 11.92821 | -4.30414 |
| C | -10.81030 | 11.40045 | -5.12671 |
| C | -10.49462 | 10.39822 | -6.03935 |
| N | -11.39044 | 9.81744  | -6.93200 |
| C | -12.69740 | 9.82689  | -6.59202 |
| C | -13.71386 | 9.24337  | -7.46701 |
| C | -15.02092 | 9.38353  | -7.01462 |
| C | -16.07011 | 8.87733  | -7.77144 |
| C | -15.81637 | 8.23072  | -8.97504 |
| C | -14.50920 | 8.09495  | -9.41118 |
| C | -13.47523 | 8.59983  | -8.65466 |

|   |           |          |           |
|---|-----------|----------|-----------|
| H | -6.57609  | 4.34733  | -10.48047 |
| H | -5.61009  | 6.90522  | -7.13989  |
| H | -7.08837  | 8.43298  | -6.27462  |
| H | -7.14658  | 10.10272 | -5.39484  |
| H | -7.72355  | 11.88459 | -3.74892  |
| H | -10.06131 | 12.72129 | -3.57597  |
| H | -11.84131 | 11.78153 | -5.04997  |
| H | -13.01817 | 10.28195 | -5.64088  |
| H | -15.23896 | 9.89930  | -6.06221  |
| H | -16.64581 | 7.82916  | -9.58209  |
| O | -4.49688  | 4.37606  | -7.37659  |
| C | -17.48263 | 9.04975  | -7.28254  |
| C | -4.61325  | 4.93248  | -8.67639  |
| H | -14.29530 | 7.58646  | -10.36188 |
| H | -8.80617  | 5.43006  | -10.64917 |
| H | -18.23001 | 8.58915  | -7.96148  |
| H | -17.72058 | 10.13487 | -7.24908  |
| H | -4.43784  | 4.15386  | -9.44783  |
| H | -3.82258  | 5.70120  | -8.81208  |
| C | -17.79359 | 7.10912  | -5.90513  |
| H | -18.30457 | 6.87519  | -4.94524  |
| H | -18.47172 | 6.75952  | -6.71243  |
| C | -5.36285  | 3.26072  | -7.19112  |
| C | -5.09737  | 2.70425  | -5.79392  |
| H | -5.15475  | 2.48230  | -7.95714  |
| H | -6.42344  | 3.57276  | -7.29496  |
| H | -4.02863  | 2.40404  | -5.72958  |
| H | -5.24448  | 3.49717  | -5.03085  |
| C | -16.45889 | 6.36876  | -5.94093  |
| H | -15.99390 | 6.45613  | -6.94511  |
| H | -15.76849 | 6.82789  | -5.20272  |
| C | -15.53389 | 4.19643  | -5.45455  |
| C | -14.90625 | 4.43504  | -4.07877  |
| H | -15.84153 | 3.13036  | -5.53107  |
| H | -14.80045 | 4.37270  | -6.26996  |
| H | -15.70713 | 4.47054  | -3.30787  |
| H | -14.36206 | 5.40317  | -4.05479  |
| C | -7.23809  | 1.84349  | -5.11141  |
| C | -7.96152  | 0.51796  | -4.86983  |
| H | -7.23073  | 2.45497  | -4.18554  |
| H | -7.76548  | 2.42282  | -5.89871  |
| H | -8.06258  | -0.02194 | -5.83673  |
| H | -7.36912  | -0.14412 | -4.20227  |
| C | -13.43326 | 3.47051  | -2.48950  |
| H | -12.72522 | 4.32606  | -2.44637  |
| H | -14.23395 | 3.65457  | -1.73981  |
| C | -9.28388  | 1.00184  | -2.93261  |
| C | -10.72219 | 0.93821  | -2.41162  |
| H | -8.84917  | 2.00188  | -2.72385  |
| H | -8.67135  | 0.24601  | -2.39379  |
| H | -10.70588 | 0.76526  | -1.31286  |

|    |           |          |           |
|----|-----------|----------|-----------|
| H  | -11.25811 | 0.08393  | -2.88025  |
| C  | -12.71528 | 2.16373  | -2.13838  |
| H  | -13.29866 | 1.29717  | -2.51945  |
| H  | -12.64988 | 2.06525  | -1.03230  |
| O  | -17.60322 | 8.52240  | -5.96676  |
| O  | -16.70298 | 4.99707  | -5.62678  |
| O  | -14.01099 | 3.36539  | -3.78871  |
| O  | -11.39971 | 2.16174  | -2.68529  |
| O  | -9.26709  | 0.72074  | -4.33108  |
| O  | -5.89839  | 1.55570  | -5.50878  |
| Zn | -10.38316 | 9.18581  | -8.95142  |
| H  | -7.08650  | 8.06958  | -12.93776 |
| C  | -7.08043  | 8.81722  | -12.11143 |
| H  | -6.48973  | 8.36934  | -11.27947 |
| C  | -8.50626  | 9.18219  | -11.66849 |
| H  | -6.51831  | 9.70538  | -12.47805 |
| H  | -9.02983  | 8.25132  | -11.35926 |
| H  | -9.06589  | 9.57561  | -12.54942 |
| C  | -8.51686  | 10.22376 | -10.54478 |
| H  | -7.82758  | 9.90756  | -9.73117  |
| N  | -9.89581  | 10.43158 | -9.98571  |
| H  | -8.10330  | 11.17138 | -10.95188 |
| H  | -10.77427 | 14.44218 | -8.92568  |
| H  | -10.42689 | 10.64928 | -10.86525 |
| C  | -9.86543  | 11.79191 | -9.35584  |
| H  | -9.24879  | 11.76201 | -8.43155  |
| C  | -11.27332 | 12.29382 | -9.02410  |
| H  | -9.38558  | 12.53097 | -10.03342 |
| H  | -11.81388 | 11.56296 | -8.38506  |
| H  | -11.86914 | 12.39063 | -9.96211  |
| C  | -11.25717 | 13.65283 | -8.30656  |
| H  | -10.70646 | 13.60718 | -7.33956  |
| H  | -12.28860 | 14.00606 | -8.07541  |
